# Supplementary material for: Natural Killer Cell Education Is Associated With a Distinct Glycolytic Profile
Source: Front Immunol. 2018 Dec 19;9:3020. doi: 10.3389/fimmu.2018.03020 (PMC6305746; doi:10.3389/fimmu.2018.03020)
Supplement: Supplementary file 1 [file Data_Sheet_1.docx]

Supplementary Material

Natural Killer Cell Education Is Associated With

a Distinct Glycolytic Profile

Caroline Pfeifer1, Andrew J. Highton1, Sven Peine2, Jürgen Sauter3, Alexander H. Schmidt3,4, Madeleine J. Bunders1,5, Marcus Altfeld1,6, Christian Körner1*

1Research Department Virus Immunology, Heinrich Pette Institute, Leibniz Institute for Experimental Virology, Hamburg, Germany

2Institute for Transfusion Medicine, University Medical Center Hamburg-Eppendorf, Hamburg, Germany

3DKMS gemeinnützige GmbH, Tübingen, Germany

4DKMS Life Science Lab, Dresden, Germany

5Department of Experimental Immunology and the Emma Children's Hospital, Amsterdam University Medical Center, University of Amsterdam, Amsterdam, the Netherlands

6Institute of Immunology, University Medical Center Hamburg-Eppendorf, Hamburg, Germany

*** Correspondence:**
Christian Körner

[christian.koerner@leibniz-hpi.de](mailto:christian.koerner@leibniz-hpi.de)

# Supplementary Figures

## Supplementary Figure 1 | NK‑cell gating strategy


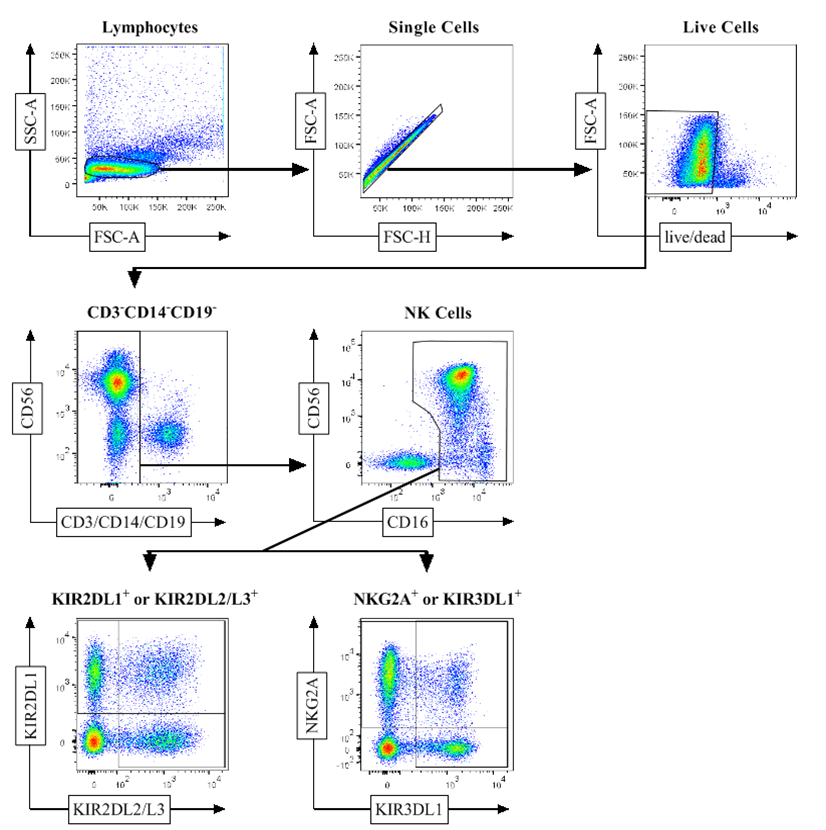


**Supplementary Figure 1 | NK-cell gating strategy**

Flow cytometric assessment of NK‑cell subsets. Lymphocytes were gated using forward and sideward scatter (FSC‑A/SSC‑A). Single cells were then identified by area and height of the forward scatter. Exclusion of dead cells was performed using the viability dye LIVE/DEAD Fixable Blue. Subsequently NK cells were identified by the exclusion of CD3+, CD14+, and CD19+ cells and the expression of either CD56 or CD16. NK‑cell subsets were further defined by the expression of the inhibitory receptors KIR2DL1, KIR2DL2/L3, KIR3DL1 and NKG2A.

## Supplementary Figure 2 | Increased levels of CD107a in educated NK-cell subsets


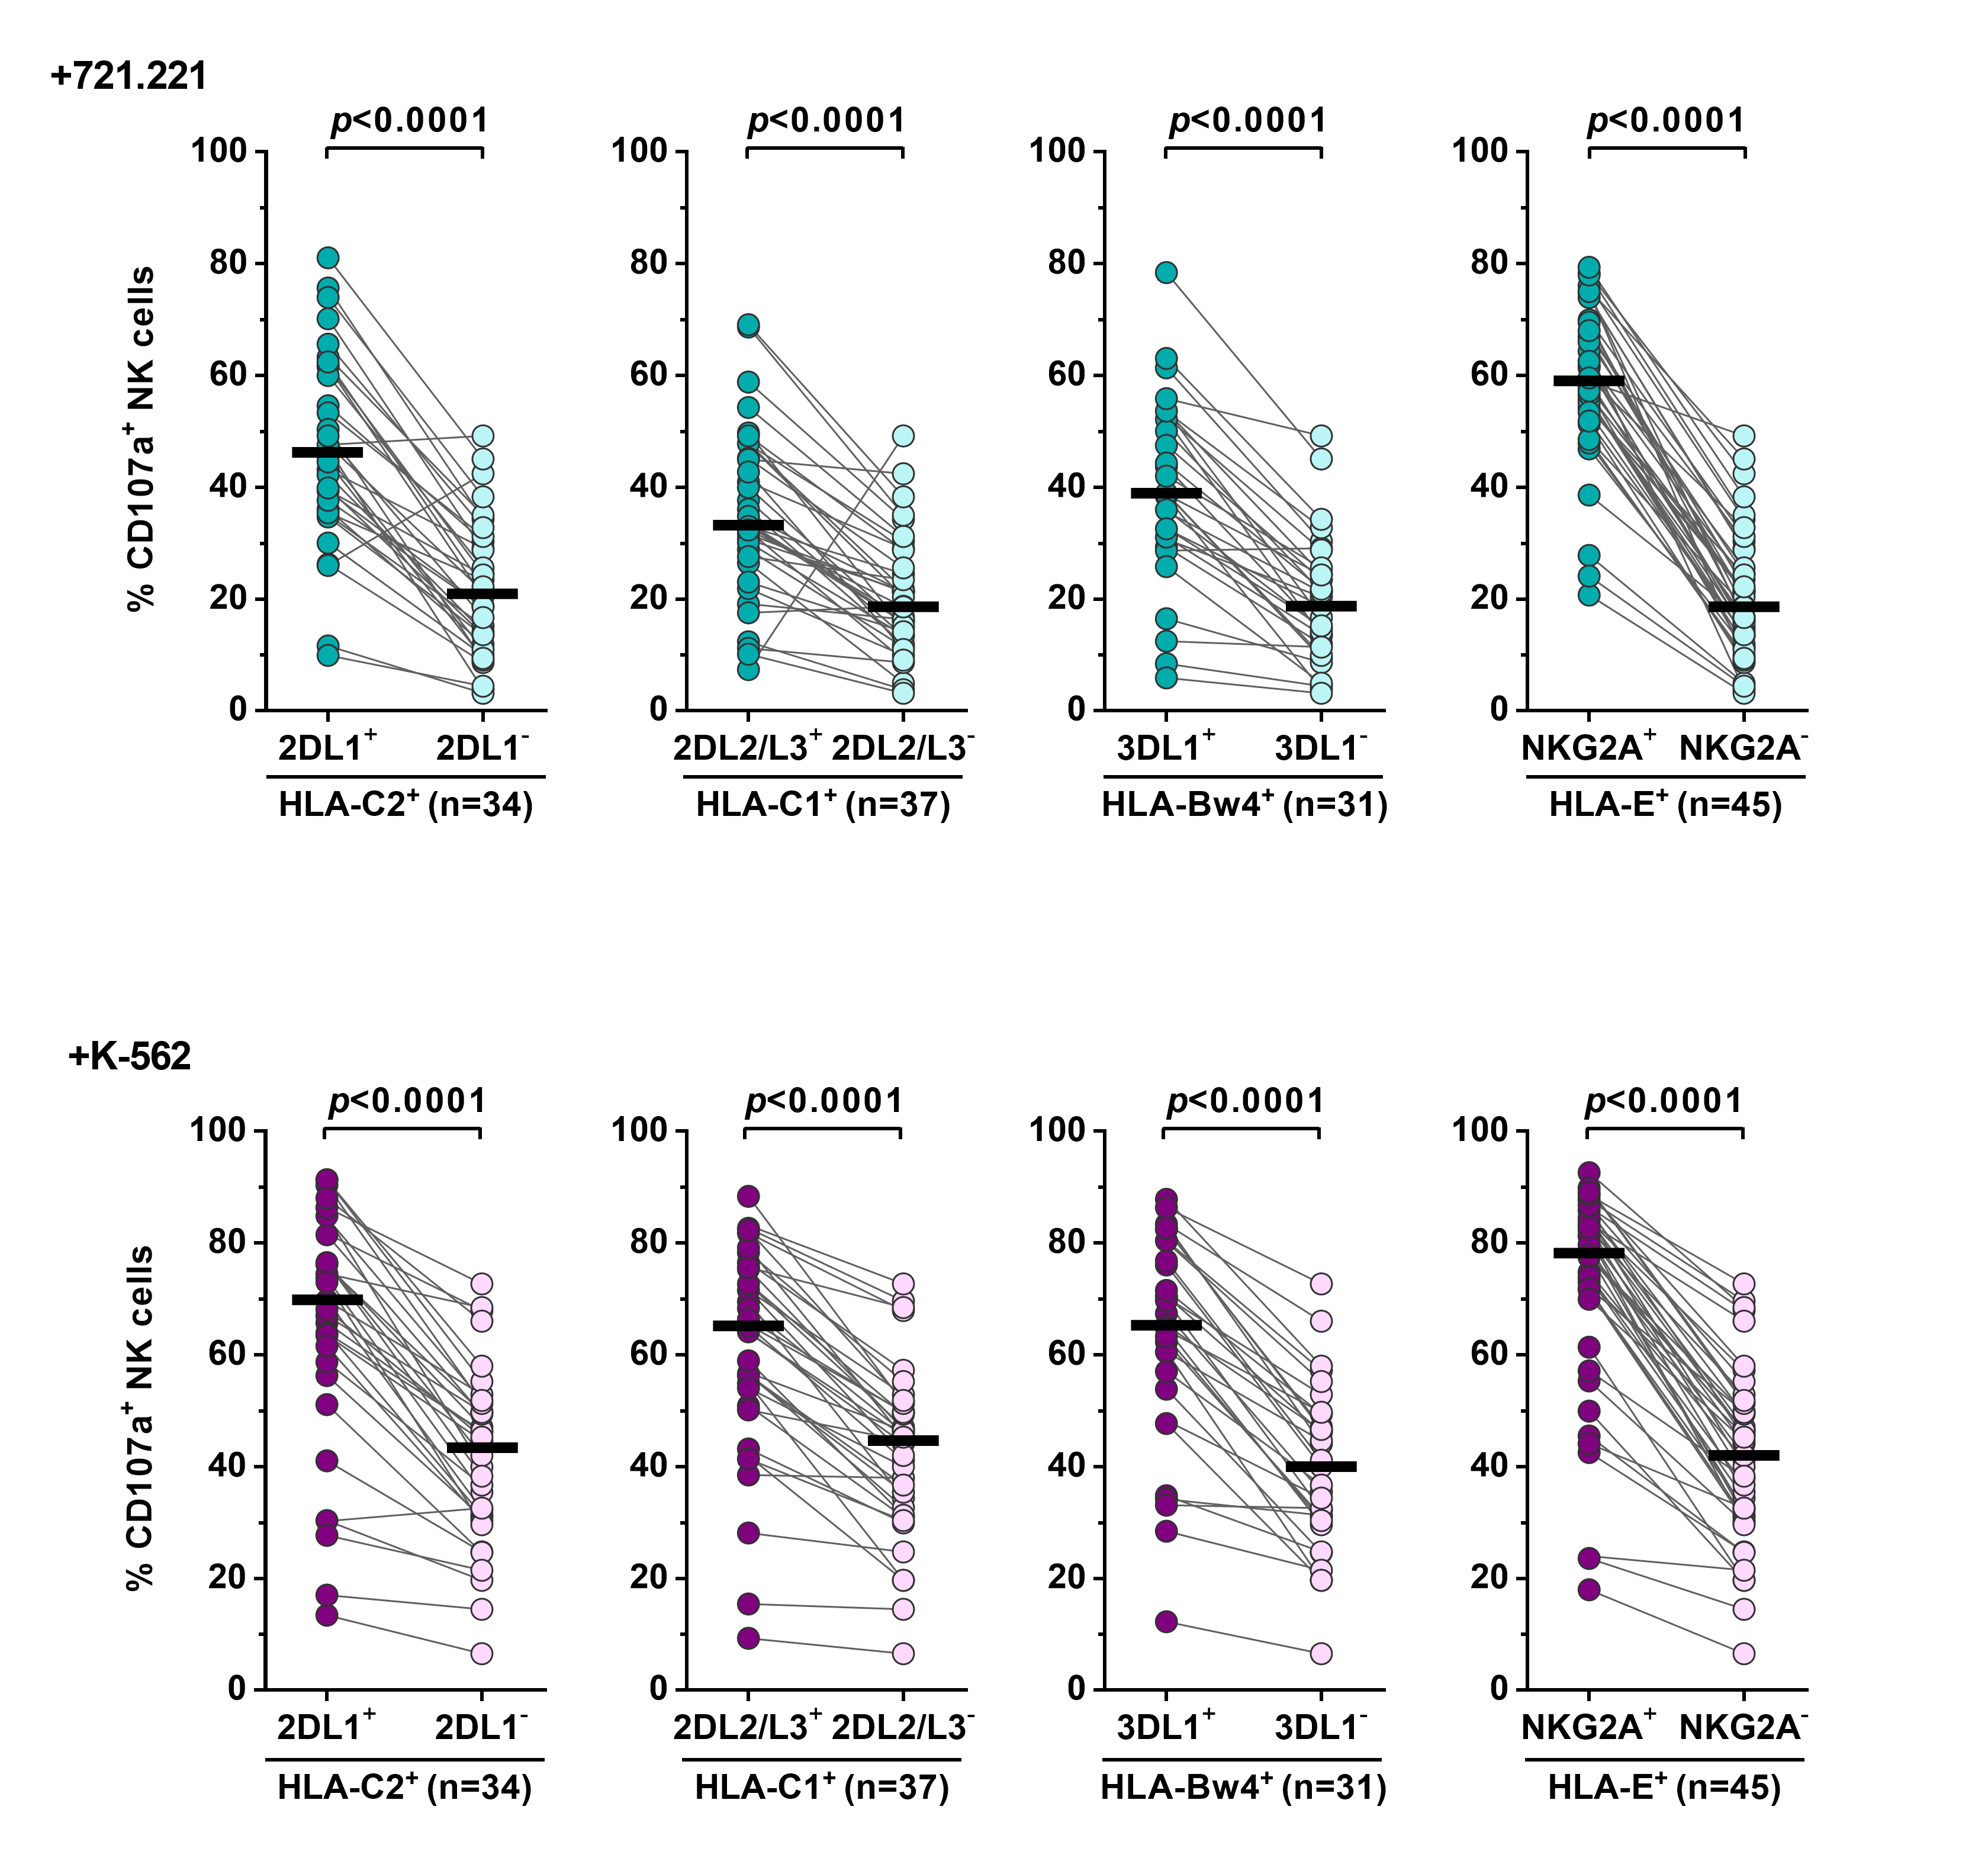


**Supplementary Figure 2 | Increased levels of CD107a in educated NK-cell subsets**

Flow cytometric assessment of NK‑cell function after exposure to various target cells. Enriched primary NK cells from healthy donors were cultured for 4 h in the presence of 721.221 cells (cyan) or K‑562 cells (purple). The figure shows the CD107a expression frequency of NK-cell subsets that are either single positive for one of the investigated self-inhibitory receptors (2DL1, 2DL2/L3, 3DL1 or NKG2A) or subsets that lack all of the investigated self-inhibitory receptors in donors that express the cognate HLA class I molecule (Upper panel: +721.221, lower panel: +K-562). Statistical analysis: Wilcoxon matched-pairs signed-rank test with subsequent Bonferroni correction. Black bars represent the median.

## Supplementary Figure 3 | Upregulation of Glut1 in educated and uneducated NK cell
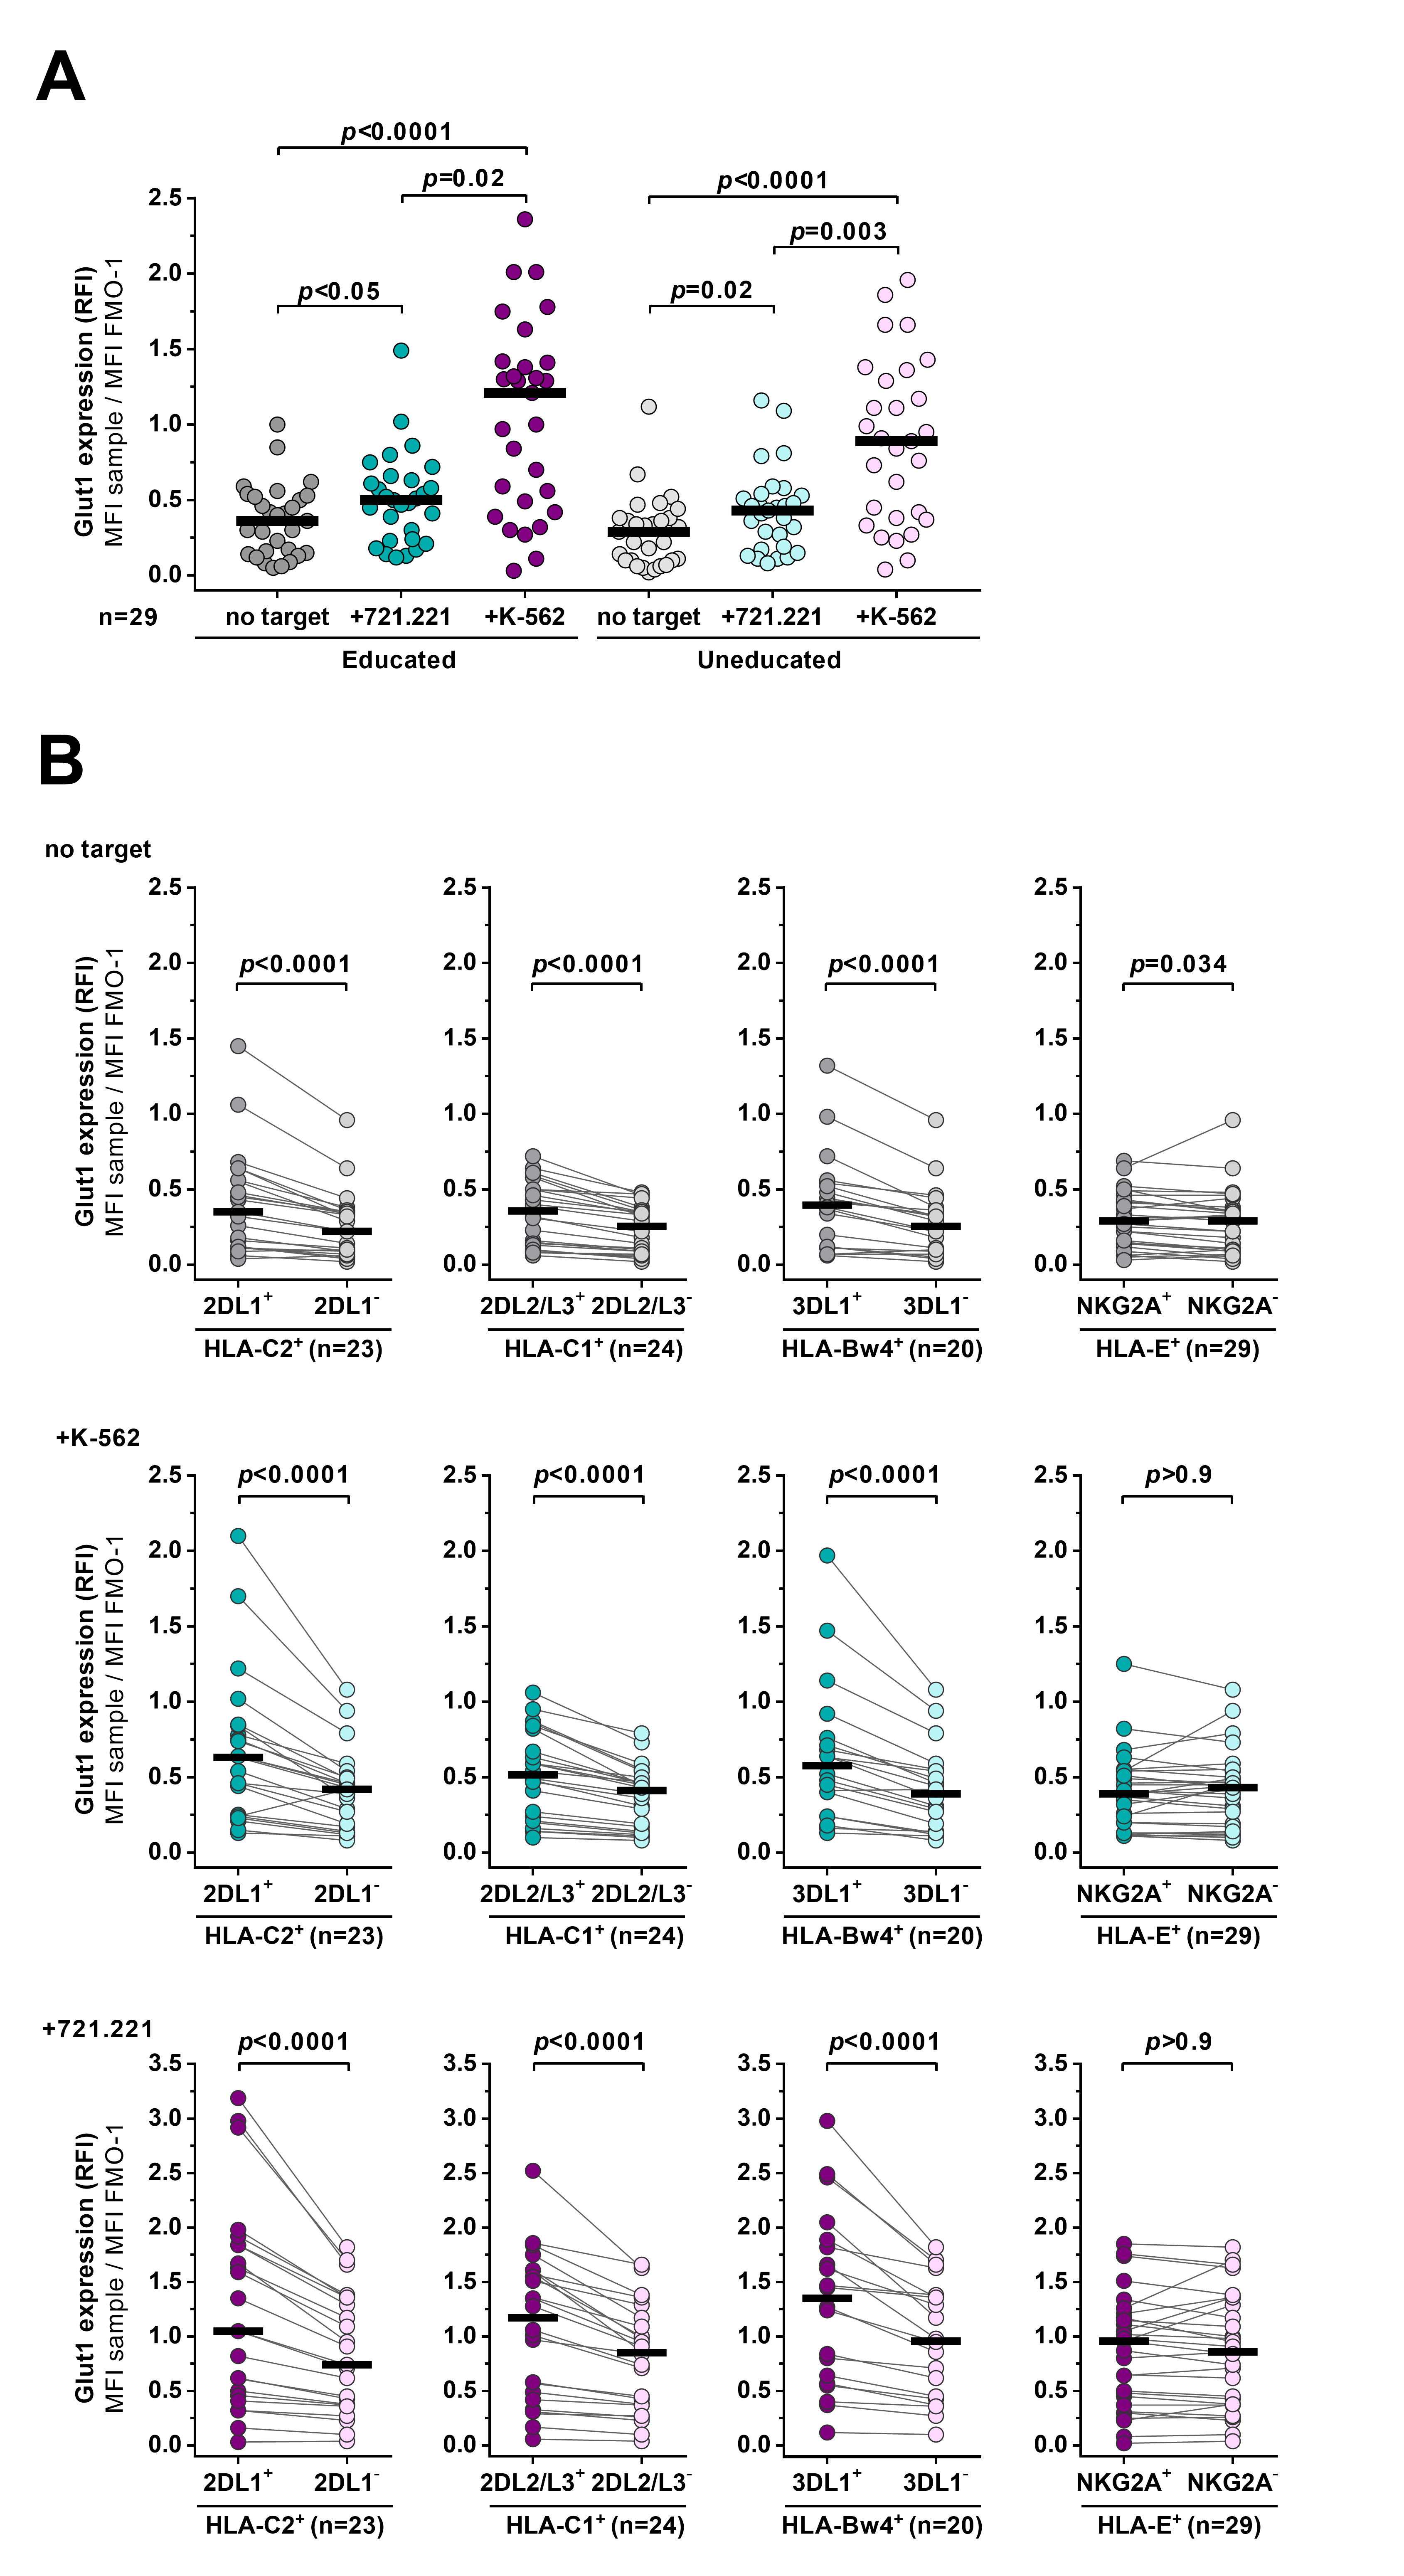
subsets

**Supplementary Figure 3 | Upregulation of Glut1 in educated and uneducated NK-cell subsets.**

Flow cytometric assessment of the glucose transporter Glut1 expression on NK cells with and without exposure to various target cells. Enriched primary NK cells from healthy donors were cultured for 4 h either in absence (gray) or in presence of 721.221 cells (cyan) or K‑562 cells (purple). **(A)** Comparison of Glut1 expression (RFI) within educated and uneducated NK cells. Statistical analysis: Friedman test, Dunn's multiple comparisons test. Black bars represent the median. **(B)** Comparison of Glut1 expression (RFI) between NK-cell subsets that are single positive for one of the investigated self-inhibitory receptors (2DL1, 2DL2/L3, 3DL1 or NKG2A) and subsets that lack all of the investigated self-inhibitory receptors in donors that express the cognate HLA class I molecule (Upper panel: no target, middle panel: +721.221, lower panel: +K-562). Statistical analysis: Wilcoxon matched‑pairs signed-rank test with subsequent Bonferroni correction. Black bars represent the median.

# Supplementary Tables

## Supplementary Table 1 | Key resource table

| **Reagent or resource** | **Conjugate** | **Clone** | **Source** | **Catalogue Number / Research Resource Identifiers (RRIDs)** |
| --- | --- | --- | --- | --- |
| **Antibodies** |  |  |  |  |
| α-human CD56 | BUV395 | NCAM16.2 | BD Bioscience | Cat#563554, RRID:AB_2687886 |
| α-human CD16 | BV785 | 3G8 | Biolegend, Inc. | Cat#302046, RRID:AB_2563803 |
| α-human CD107a | BV510 | H4A3 | Biolegend, Inc. | Cat#328632, RRID:AB_2562648 |
| α-human KIR3DL1 | BV421 | DX9 | Biolegend, Inc. | Cat#312714, RRID:AB_2561652 |
| α-human CD3 | PerCP-Cy5.5 | UCHT1 | Biolegend, Inc. | Cat#300430, RRID:AB_893299 |
| α-human CD14 | PerCP-Cy5.5 | HCD14 | Biolegend, Inc. | Cat#325622, RRID:AB_893250 |
| α-human CD19 | PerCP-Cy5.5 | HIB19 | Biolegend, Inc. | Cat#302230, RRID:AB_2073119 |
| α-human NKG2A | Pe-Cy7 | Z199 | Beckman Coulter | Cat#B10246, RRID:AB_2687887 |
| α-human KIR2DL2/L3/S2 | PE | DX27 | Biolegend, Inc. | Cat#312606, RRID:AB_2130554 |
| α-human KIR2DL1/S5 | APC | 143211 | R&D Systems | Cat#FAB1844A-100, RRID:AB_416855 |
| α-human KIR2DL1/S5 | FITC | 143211 | R&D Systems | Cat#FAB1844F-100, RRID:AB_2130402 |
| α-human KIR2DL3 | APC | 180701 | R&D Systems | Cat#FAB2014A-100, RRID:AB_416869 |
| α-human GLUT1 (SLC2A1) receptor binding protein (RBD) | eGFP |  | Metafora Biosystems | Cat#GLUT1-G100 |
| **Biological Samples** |  |  |  |  |
| Human peripheral blood mononuclear cells (PBMCs) |  |  | University medical center Hamburg-Eppendorf, Hamburg, Germany |  |
| **Chemicals** |  |  |  |  |
| LIVE/DEAD Fixable Blue Dead Cell Stain Kit, for UV excitation |  |  | Invitrogen | Cat#L23105 |
| Protein Transport Inhibitor (containing Monensin) / BD GolgiStop |  |  | BD Bioscience | Cat#554724 |
| 2-NBDG (2-deoxy-2-[(7-nitro-2,1,3-benzoxadiazol-4-yl)amino]-D-Glucose) |  |  | Biomol | Cay11046-1 |
| 2-DG (2-Deoxy-D-glucose) |  |  | Sigma-Aldrich | D3179-1G |
| RPMI 1640 Medium, no glucose |  |  | ThermoFisher | 11879020 |
| **Critical Commercial Assays** |  |  |  |  |
| EasySep Human NK Cell Enrichment Kit |  |  | Stemcell | Cat#19055 |
| Seahorse XF Glycolysis Stress Test Kit |  |  | Seahorse Bioscience/Agilent | Cat#103020-100 |
| **Cell lines** |  |  |  |  |
| LCL 721.221 |  |  | ATCC | ATCC Cat# CRL-1855, RRID:CVCL_6263 |
| K-562 |  |  | DSMZ | DSMZ Cat# ACC 10. RRID:CVCL_0004 |
| **Software and Algorithms** |  |  |  |  |
| FlowJo software v10.4.2 |  |  | Tree Star | <https://www.flowjo.com/>, RRID:SCR_008520 |
| Wave software, v 2.3.0.19 |  |  | Agilent | https://www.agilent.com/en/products/cell-analysis/cell-analysis-software |

## Supplementary table 2 | HLA class I genotyping

| **Number** | **Sample** **ID** | **HLA-A** | | **HLA-B** | | **Bw4/6+** | **HLA-C** | | **HLA-C Haplotype C1/C2** | **Glucose**  **Uptake** | **2-DG/**  **GfM** | **Seahorse Assay** | **Glut1 Assay** | **CD107a Assay** |
| --- | --- | --- | --- | --- | --- | --- | --- | --- | --- | --- | --- | --- | --- | --- |
| **A1** | **A2** | **B1** | **B2** |  | **C1** | **C2** |
| 1 | 180322_BC_A | 01:01 | 02:01 | 15:01 | 44:02 | 4 | 03:04 | 05:01 | 1/2 |  |  | + | + | + |
| 2 | 180322_BC_C | 01:01 | 23:01 | 37:01 | 44:03 | 4 | 04:01 | 06:02 | 2/2 |  |  |  | + | + |
| 3 | 180322_BC_D | 02:06 | 03:01 | 15:01 | 18:01 | 6 | 03:03 | 12:03 | 1/1 |  |  |  | + | + |
| 4 | 180316_BC_A | 03:01 | 25:01 | 35:01 | 44:02 | 4 | 04:01 | 07:04 | 1/2 |  |  | + | + | + |
| 5 | 180316_BC_B | 03:01 | 03:01 | 07:04 | 56:01 | 6 | 01:02 | 07:02 | 1/1 |  |  |  | + | + |
| 6 | 180316_BC_C | 01:01 | 36:01 | 08:01 | 15:03 | 6 | 04:01 | 07:01 | 1/2 |  |  |  | + | + |
| 7 | 180316_BC_D | 68:01 | 03:01 | 27:05 | 07:02 | 4 | 07:02 | 02:02 | 1/2 |  |  |  | + | + |
| 8 | 180308_BC_A | 01:02 | 29:02 | 27:05 | 49:01 | 4 | 02:02 | 07:01 | 1/2 |  |  |  | + | + |
| 9 | 180308_BC_B | 02:01 | 29:02 | 44:02 | 44:03 | 4 | 05:01 | 16:01 | 1/2 |  |  |  | + | + |
| 10 | 180308_BC_C | 01:01 | 24:02 | 08:01 | 40:02 | 4 | 02:02 | 07:01 | 1/2 |  |  |  | + | + |
| 11 | 180308_BC_D | 01:01 | 25:01 | 39:01 | 57:01 | 4 | 06:02 | 12:03 | 1/2 |  |  | + | + | + |
| 12 | 180201_BC_A | 02:01 | 31:01 | 15:01 | 51:01 | 4 | 03:04 | 15:02 | 1/2 |  |  | + | + | + |
| 13 | 180201_BC_B | 02:01 | 03:02 | 35:03 | 44:02 | 4 | 04:01 | 12:03 | 1/2 |  |  | + | + | + |
| 14 | 180201_BC_C | 02:01 | 03:01 | 35:01 | 57:01 | 4 | 04:01 | 06:02 | 2/2 |  |  |  | + | + |
| 15 | 180201_BC_D | 01:01 | 24:02 | 07:02 | 55:01 | 4 | 03:03 | 07:02 | 1/1 |  |  | + | + | + |
| 16 | 180110_BC_A | 02:01 | 11:01 | 08:01 | 44:02 | 4 | 05:01 | 07:01 | 1/2 |  |  |  | + | + |
| 17 | 180110_BC_B | 02:01 | 30:01 | 13:02 | 18:01 | 4 | 06:02 | 07:01 | 1/2 |  |  |  | + | + |
| 18 | 180110_BC_C | 01:01 | 02:01 | 07:02 | 52:01 | 4 | 07:02 | 12:02 | 1/1 |  |  |  | + | + |
| 19 | 180110_BC_D | 01:01 | 01:01 | 07:02 | 44:03 | 4 | 07:02 | 16:01 | 1/1 |  |  |  | + | + |
| 20 | 171129_BC_A | 01:01 | 23:01 | 37:01 | 44:03 | 4 | 04:01 | 06:02 | 2/2 |  |  | + | + | + |
| 21 | 171129_BC_B | 26:01 | 29:01 | 07:05 | 55:01 | 6 | 03:03 | 15:05 | 1/2 |  |  |  | + | + |
| 22 | 171129_BC_C | 02:01 | 02:01 | 51:01 | 51:01 | 4 | 14:02 | 16:02 | 1/2 |  |  |  | + | + |
| 23 | 171129_BC_D | 03:01 | 23:01 | 35:01 | 41:01 | 4 | 04:01 | 17:01 | 2/2 |  |  |  | + | + |
| 24 | 171109_BC_B | 02:01 | 29:02 | 35:01 | 44:02 | 4 | 03:04 | 05:01 | 1/2 |  |  |  | + | + |
| 25 | 171109_BC_C | 02:01 | 30:01 | 15:01 | 35:01 | 6 | 03:04 | 04:01 | 1/2 |  |  |  | + | + |
| 26 | 171109_BC_D | 01:01 | 32:01 | 40:02 | 57:01 | 4 | 02:02 | 06:02 | 2/2 |  |  |  | + | + |
| 27 | 171026_BC_B | 02:01 | 33:01 | 14:02 | 15:01 | 6 | 03:03 | 08:02 | 1/1 |  |  |  | + | + |
| 28 | 171026_BC_C | 01:01 | 68:01 | 08:01 | 35:01 | 6 | 04:01 | 07:01 | 1/2 |  |  |  | + | + |
| 29 | 171026_BC_D | 01:01 | 31:01 | 08:01 | 35:01 | 6 | 04:01 | 07:01 | 1/2 |  |  |  | + | + |
| 30 | 171011_BC_A | 02:01 | 11:01 | 08:01 | 44:02 | 4 | 05:01 | 07:01 | 1/2 |  |  | + |  | + |
| 31 | 171011_BC_B | 02:05 | 03:01 | 07:02 | 50:01 | 6 | 06:02 | 07:02 | 1/2 |  |  |  |  | + |
| 32 | 171011_BC_C | 01:01 | 03:01 | 07:05 | 08:01 | 6 | 07:01 | 15:05 | 1/2 |  |  |  |  | + |
| 33 | 171011_BC_D | 02:01 | 24:02 | 44:02 | 44:05 | 4 | 02:02 | 05:01 | 2/2 |  |  |  |  | + |
| 34 | 170816_BC_C | 02:01 | 24:02 | 15:01 | 44:05 | 4 | 02:02 | 03:03 | 1/2 |  |  | + |  | + |
| 35 | 170816_BC_D | 02:01 | 03:01 | 35:0 | 45:01 | 6 | 04:01 | 06:02 | 2/2 |  |  |  |  | + |
| 36 | 170810_BC_C | 01:01 | 24:02 | 44:02 | 57:01 | 4 | 05:01 | 06:02 | 2/2 |  |  | + |  | + |
| 37 | 170810_BC_E | 02:01 | 24:02 | 15:01 | 27:05 | 4 | 02:02 | 03:03 | 1/2 |  |  | + |  | + |
| 38 | 170727_BC_B | 03:01 | 25:01 | 35:01 | 44:02 | 4 | 04:01 | 07:04 | 1/2 |  |  | + |  | + |
| 39 | 170727_BC_C | 03:01 | 68:01 | 40:01 | 45:01 | 6 | 03:04 | 16:01 | 1/1 |  |  |  |  | + |
| 40 | 170727_BC_D | 02:06 | 32:01 | 35:01 | 37:01 | 4 | 03:03 | 06:02 | 1/2 |  |  | + |  | + |
| 41 | 170713_BC_D | 32:01 | 68:01 | 39:01 | 44:02 | 4 | 07:02 | 07:04 | 1/1 |  |  | + |  | + |
| 42 | 170706_BC_B | 02:01 | 03:01 | 15:01 | 40:01 | 6 | 03:04 | 03:04 | 1/1 |  |  | + |  | + |
| 43 | 170706_BC_C | 03:01 | 24:02 | 08:01 | 57:01 | 4 | 06:02 | 07:01 | 1/2 |  |  | + |  | + |
| 44 | 170629_BC_C | 01:01 | 02:01 | 08:01 | 58:01 | 4 | 03:02 | 07:01 | 1/1 |  |  | + |  | + |
| 45 | 170629_BC_D | 02:01 | 26:01 | 15:01 | 38:01 | 4 | 03:03 | 12:03 | 1/1 |  |  | + |  | + |
| 46 | HCHH102 | 02:01 | 66:01 | 15:01 | 15:17 | 4 | 03:04 | 17 | 1/2 | + | + |  |  |  |
| 47 | HCHH103 | 03:01 | 03:01 | 07:02 | 35:01 | 6 | 04:01 | 07:02 | 1/2 | + | + |  |  |  |
| 48 | HCHH160 | 02:01 | 02:01 | 13:02 | 40:01 | 4 | 03:04 | 06:02 | 1/2 | + | + |  |  |  |
| 49 | HCHH164 | 02:01 | 03:01 | 07:02 | 15:01 | 6 | 03:04 | 07:02 | 1/1 | + | + |  |  |  |
| 50 | HCHH181 | 02:01 | 02:01 | 08:01 | 13:02 | 4 | 06:02 | 07:01 | 1/2 | + | + |  |  |  |
| 51 | HCHH192 | 11:01 | 29:02 | 35:01 | 44:03 | 4 | 04:01 | 16:01 | 1/2 | + | + |  |  |  |
| **Total** |  |  |  |  |  |  |  |  |  | **6** | **6** | **18** | **29** | **45** |

Bw4+ donors were defined by carriage of HLA‑B alleles with a Bw4+ epitope and the HLA‑A alleles A-23:01, A‑24:02 and A‑32:01 (Foley *et al.*, Blood, 2008 doi:10.1182/blood-2008-01-132902). Bw6+ donors lack the above stated alleles.
